# Supplementary material
Source: PubMed Central journal article supplement (PMC8759755)
Supplement: NIHMS1761822-supplement-1761822_Sup_Tab.pdf [file NIHMS1761822-supplement-1761822_Sup_Tab.pdf]

### Supplementary Table 1

List of five overlapping genes. Five overlapping genes which were upregulated in all three RNA-Seq data (*Tert*-activated mouse cortical neurons, *Tert*-activated mouse hippocampal neurons from *R26-CAG-LSL-mTert*; *3xTg-AD*; *Camk2a-CreERT2* mouse brains, and *TERT*-activated human iPSC-derived *APP<sup>Dp</sup>* neurons) and also belonged to GO learning process.

| Symbol         | Name                                                                      | Chr |
|----------------|---------------------------------------------------------------------------|-----|
| <i>ATP1A3</i>  | ATPase, Na <sup>+</sup> /K <sup>+</sup> transporting, alpha 3 polypeptide | 7   |
| <i>CHRN2</i>   | cholinergic receptor, nicotinic, beta polypeptide 2 (neuronal)            | 3   |
| <i>SLC12A5</i> | solute carrier family 12, member 5                                        | 2   |
| <i>SNAP25</i>  | synaptosomal-associated protein 25                                        | 2   |
| <i>TBR1</i>    | T-box brain gene 1                                                        | 2   |

Supplementary Table 2

Primer sequences for RT-PCR

| Name            |     | Sequences (5'–3')              |
|-----------------|-----|--------------------------------|
| <i>Plat</i>     | For | CTG AGG TCA CAG TCC AAG CA     |
|                 | Rev | TCA GCC GGT CAG AGAAGAAT       |
| <i>Serpine1</i> | For | GTC TTT CCG ACC AAG AGC AG     |
|                 | Rev | GAC AAA GGC TGT GGA GGA AG     |
| <i>Tert</i>     | For | ACT CAG CAA CCT CCA GCC TA     |
|                 | Rev | CAT ATT GGC ACT CTG CAT GG     |
| <i>Kdm1a</i>    | For | CGAATG ACC TCT CAG GAA GC      |
|                 | Rev | GCT GGA GAG TGG CTT CAAAC      |
| <i>Kdm4a</i>    | For | CCA GAC TCA GAG GAC CAA GC     |
|                 | Rev | CTA GGT ACG GGG TGG ACA GA     |
| <i>Kdm4b</i>    | For | TGT CTG TGG TCAAGC AGG AG      |
|                 | Rev | GGC CTC AGG ATC AGT GAC AT     |
| <i>Kdm4c</i>    | For | CAC GGA GGA CAT GGA TCT CT     |
|                 | Rev | TCA CAG CCT TGG GAG CTA CT     |
| <i>Kdm4d</i>    | For | TCA CCG ATT TAT GGT GCT GA     |
|                 | Rev | TAT GCC ACA TTC CTG TTC CA     |
| <i>Suv39h1</i>  | For | CCT GCA CAA GTT TGC CTA CA     |
|                 | Rev | GAC TAC ACG GTT TGG GCA GT     |
| <i>Setdb1</i>   | For | CAG ACA AAG AAG GCC TGG AG     |
|                 | Rev | TCA GAG GAA GTG GGG ACA TC     |
| <i>G9a</i>      | For | TCA GGG CCT TCA CTG ACT CT     |
|                 | Rev | GAT GAC CAA GGC TTT TTC CA     |
| <i>App</i>      | For | TCC GAG AGG TGT GCT CTG AA     |
|                 | Rev | CCA CAT CCG CCG TAAAG AAT G    |
| <i>ApoE</i>     | For | CTC CCA AGT CAC ACAAGA ACT G   |
|                 | Rev | CCA GCT CCT TTT TGT AAG CCT TT |
| <i>Hprt1</i>    | For | AAG CTT GCT GGT GAA AAG GA     |
|                 | Rev | TTG CGC TCA TCT TAG GCT TT     |
| <i>TERT</i>     | For | GCC CTC AGA CTT CAA GAC CA     |
|                 | Rev | GCT GCT GGT GTC TGC TCT C      |
| <i>SIRT1</i>    | For | TCA GTG GCT GGAACA GTG AG      |
|                 | Rev | AGC GCC ATG GAA AAT GTA AC     |
| <i>BDNF</i>     | For | TGG CTG ACA CTT TCG AAC AC     |
|                 | Rev | AGA AGA GGA GGC TCC AAA GG     |
| <i>PSD95</i>    | For | CCG ACAAGT TTG GAT CCT GT      |

|                |     |                            |
|----------------|-----|----------------------------|
|                | Rev | CCC ATA GAG GTG GCT GTT GT |
| <i>HSF1</i>    | For | CCA GCA ACA GAA AGT CGT CA |
|                | Rev | GGC TAT ACT TGG GCA TGG AA |
| <i>HSP70-1</i> | For | CAA GAT CAC CAT CAC CAA CG |
|                | Rev | TCG TCC TCC GCT TTG TAC TT |
| <i>NRF2</i>    | For | GAG AGC CCA GTC TTC ATT GC |
|                | Rev | TGC TCAATG TCC TGT TGC AT  |
| <i>HO1</i>     | For | ATG ACA CCA AGG ACC AGA GC |
|                | Rev | GTG TAA GGA CCC ATC GGA GA |
| <i>HPRT1</i>   | For | ACC CCA CGA AGT GTT GGA TA |
|                | Rev | AAG CAG ATG GCC ACA GAA CT |
