# Supplementary material
Source: PubMed Central journal article supplement (PMC8759755)

**Extended Data Fig. 1b**

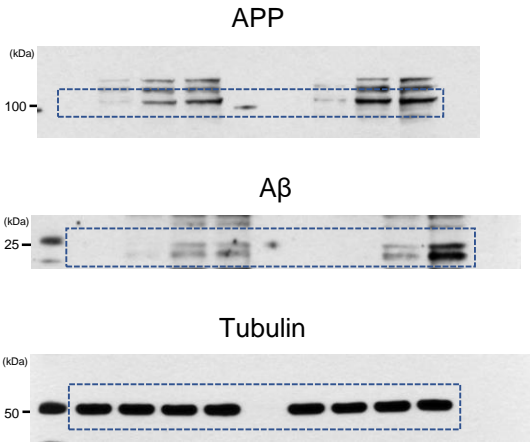

Supplement: NIHMS1761822-supplement-1761822_Unprocessed_WB_ED_Fig1.pdf [file NIHMS1761822-supplement-1761822_Unprocessed_WB_ED_Fig1.pdf]

**Extended Data Fig. 4e**

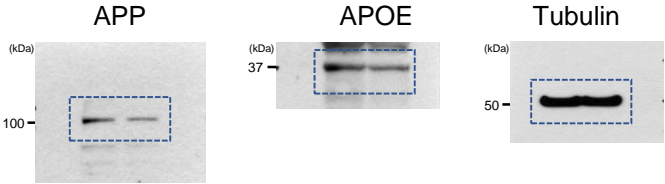

Supplement: NIHMS1761822-supplement-1761822_Unprocessed_WB_ED_Fig4.pdf [file NIHMS1761822-supplement-1761822_Unprocessed_WB_ED_Fig4.pdf]

**Extended Data Fig. 7b**

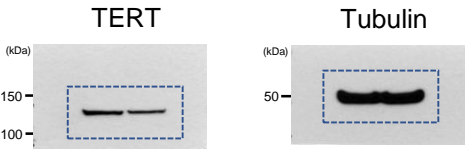

**Extended Data Fig. 7e**

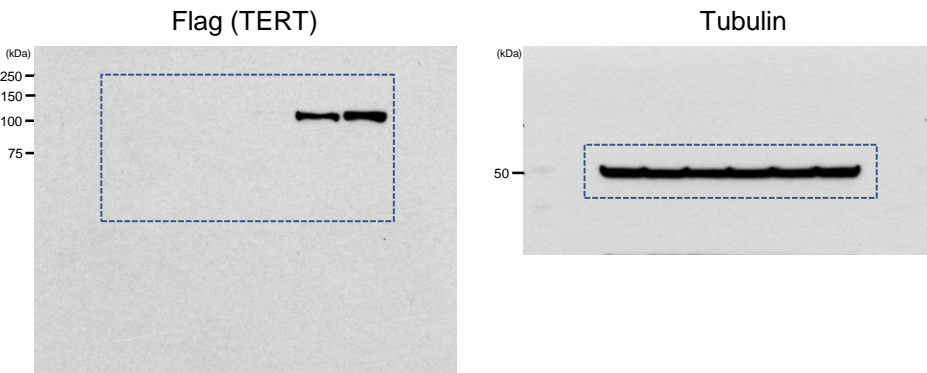

**Extended Data Fig. 7h**

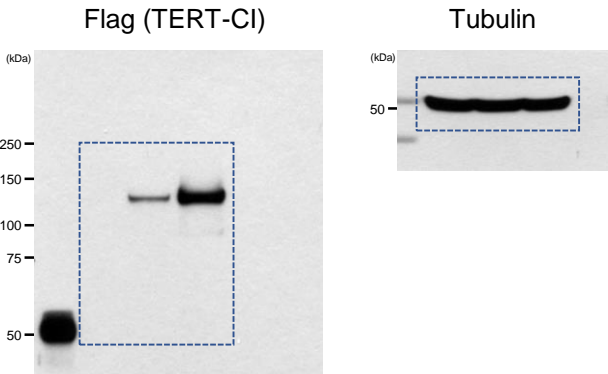

Supplement: NIHMS1761822-supplement-1761822_Unprocessed_WB_ED_Fig7.pdf [file NIHMS1761822-supplement-1761822_Unprocessed_WB_ED_Fig7.pdf]

**Fig. 1d**

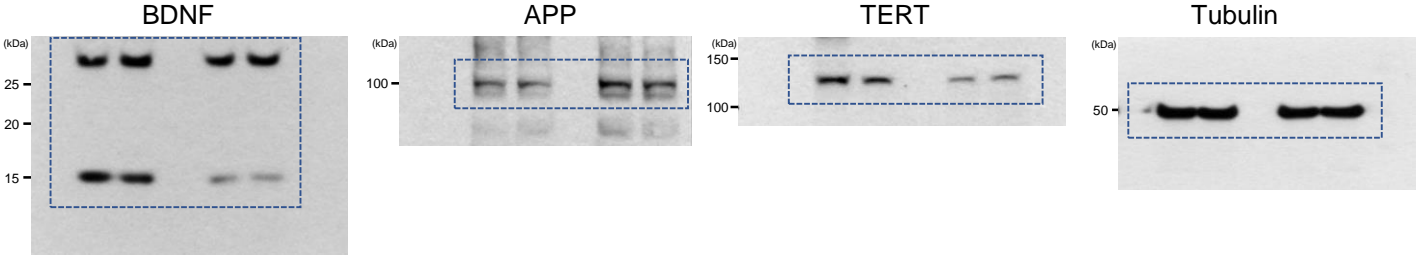

Supplement: NIHMS1761822-supplement-1761822_Unprocessed_WB_Fig1.pdf [file NIHMS1761822-supplement-1761822_Unprocessed_WB_Fig1.pdf]

**Fig. 4c**

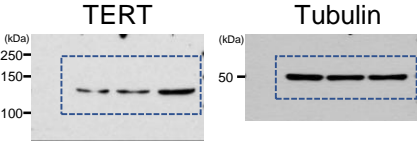

**Fig. 4d**

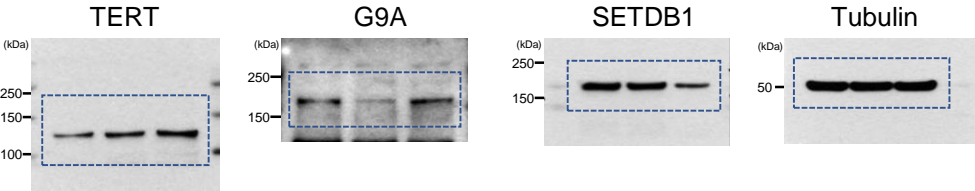

**Fig. 4g**

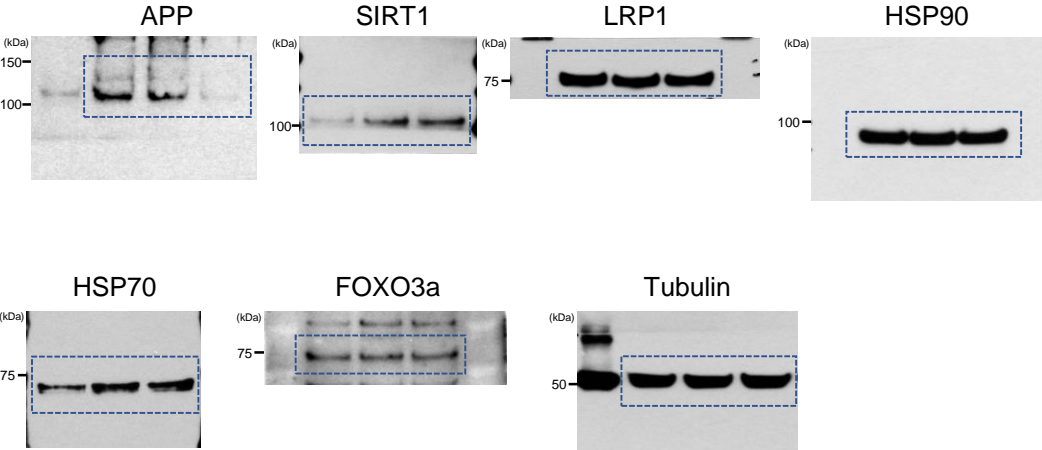

Supplement: NIHMS1761822-supplement-1761822_Unprocessed_WB_Fig4.pdf [file NIHMS1761822-supplement-1761822_Unprocessed_WB_Fig4.pdf]

**Fig. 5c**

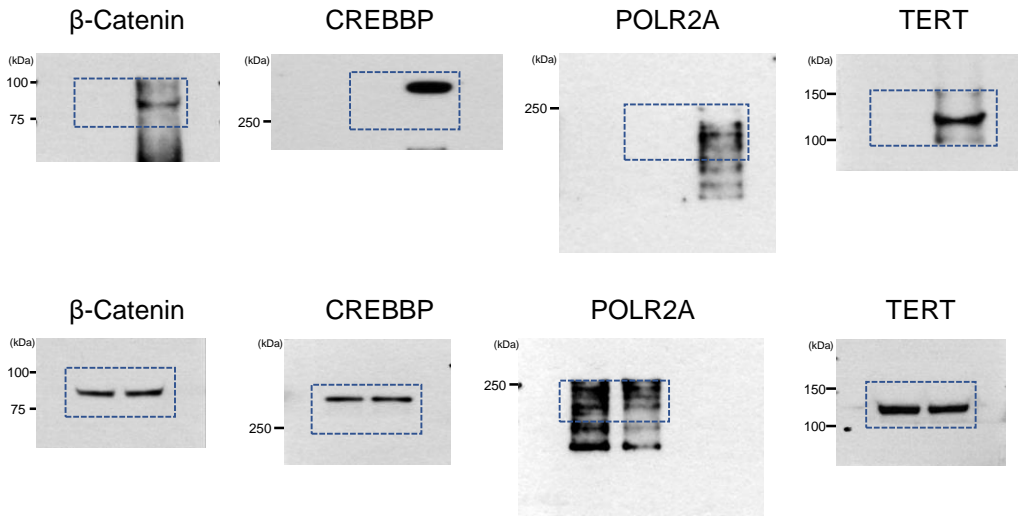

**Fig. 5d**

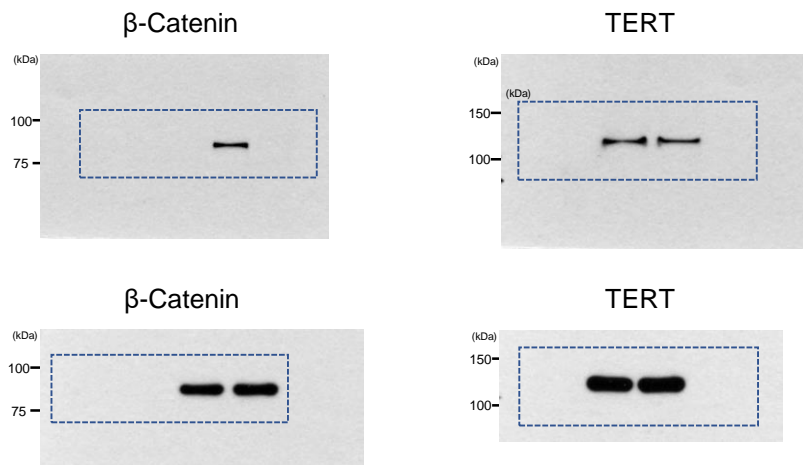

**Fig. 5f**

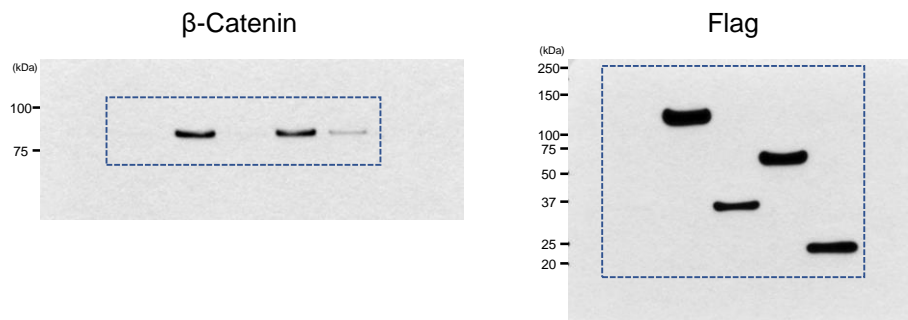

Supplement: NIHMS1761822-supplement-1761822_Unprocessed_WB_Fig5.pdf [file NIHMS1761822-supplement-1761822_Unprocessed_WB_Fig5.pdf]
